# Supplementary material for: Synthesis and evaluation of novel series of Schiff base cationic surfactants as corrosion inhibitors for carbon steel in acidic/chloride media: experimental and theoretical investigations
Source: Royal Society of Chemistry journal article supplement (doi:10.1039/c5ra21626e), 2016-01-01
Supplement: c5ra21626e1.pdf [file c5ra21626e1.pdf]

## **Supplementary data**

**Synthesis and evaluation of novel series of Schiff base cationic  
surfactants as corrosion Inhibitors for Carbon Steel in  
Acidic/Chloride Media: experimental and theoretical investigations**

**Hany M. Abd El-Lateef<sup>1\*</sup>, Ahmed H. Tantawy<sup>2</sup>**

*<sup>1</sup>Chemistry Department, Faculty of Science, Sohag University, 82524 Sohag, Egypt*

*<sup>2</sup> Chemistry Department, Faculty of science, Benha University, 13518Benha, Egypt*

**\* Corresponding author: Fax: (+2)-093 -4601159**

**Tel: (+2)-012-28-137-103**

**E-mail address: Hany\_shubra@yahoo.co.uk (Hany M. Abd El-Lateef)**

**daht1982@yahoo.com (Ahmed H. Tantawy)**

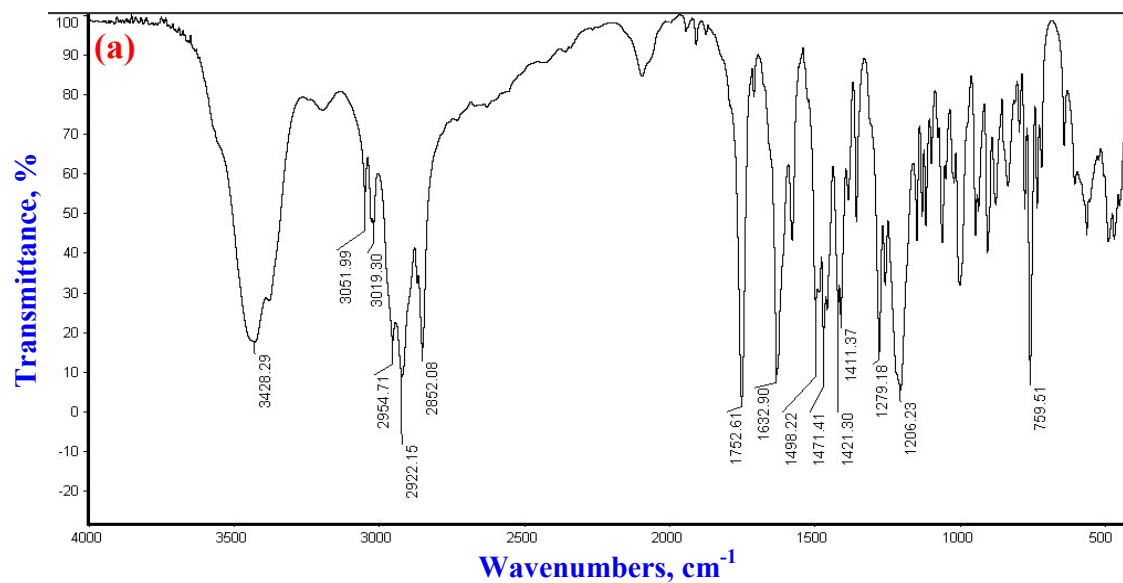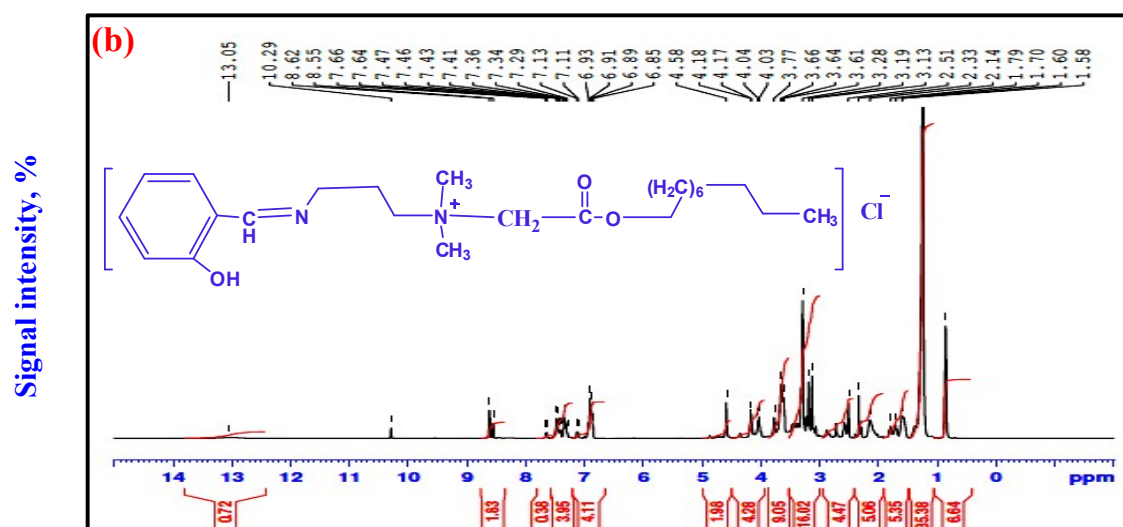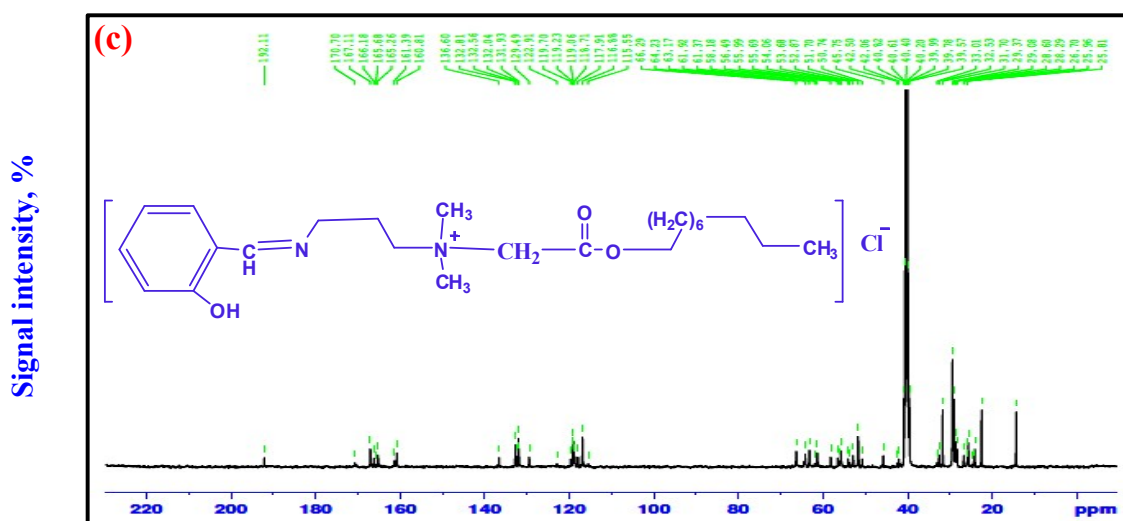

**Figure S1:** FT-IR (a)  $^1\text{H-NMR}$  (b) and  $^{13}\text{C-NMR}$  (c) spectra of 3-((2-hydroxybenzylidene) amino)-N,N-dimethyl-N-(2-oxo-2-(decyloxy)ethyl) propan-1- ammonium chloride [CSSB-10].

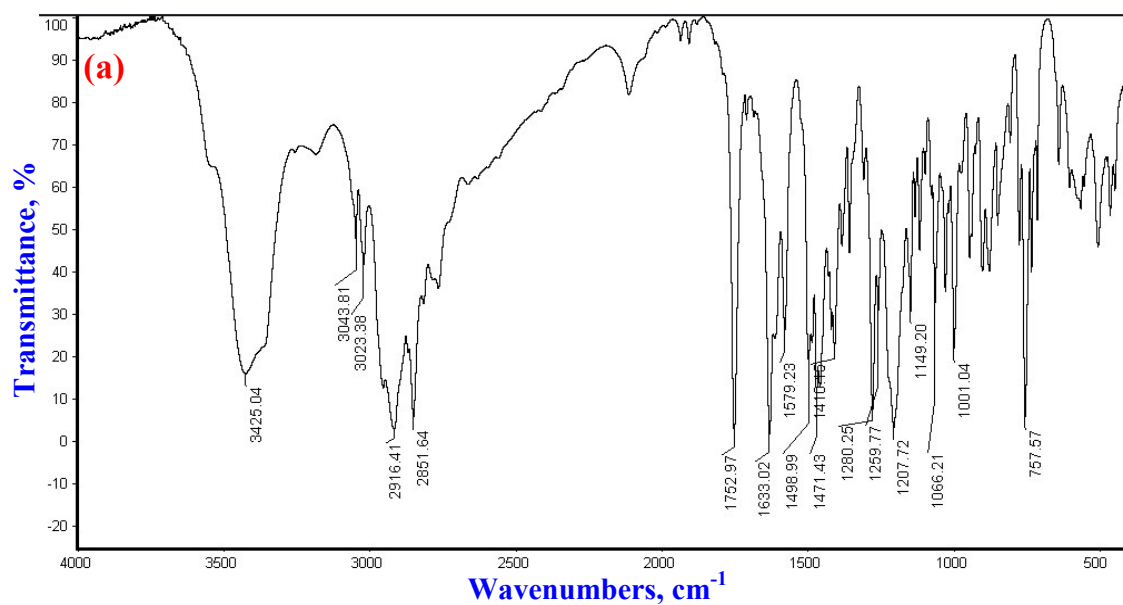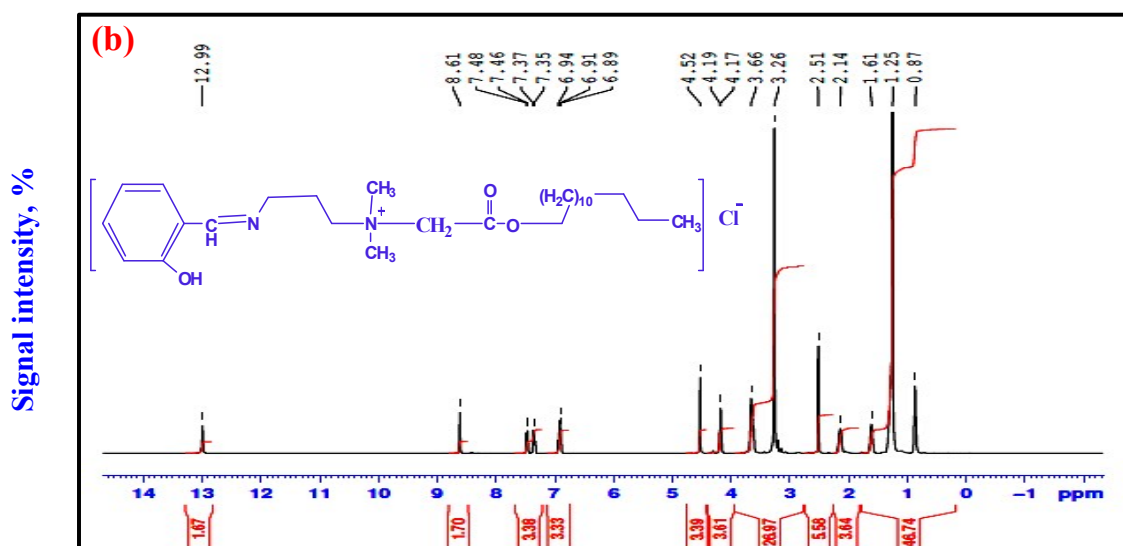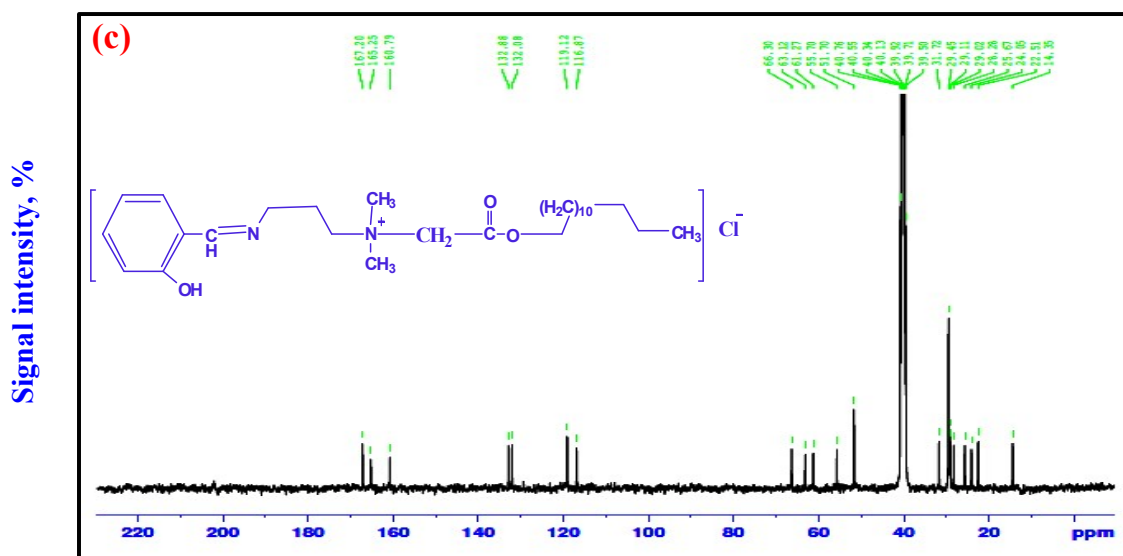

**Figure S2:** FT-IR (a)  $^1\text{H-NMR}$  (b) and  $^{13}\text{C-NMR}$  (c) spectra of ((2-hydroxybenzylidene) amino)-N,N-dimethyl-N-(2-oxo-2-(tetradecyloxy) ethyl) propan-1-ammonium chloride [CSSB-14].
